# Supplementary material for: Copy Number Variation Analysis in Familial BRCA1/2-Negative Finnish Breast and Ovarian Cancer
Source: PubMed Central journal article supplement (PMC3742470; doi:10.1371/journal.pone.0071802), 2013-08-13
Supplement: pone.0071802.s002.pdf [file pone.0071802.s002.pdf]

**Table S1. All of the identified 545 copy number variations (CNVs) at 273 different genomic regions (listed according to *P*-values).**

| Cytoband      | Chromosomal region <sup>a</sup> | Size (kb) | Type        | Gene                                         | Exon                                         | No of CNVs in |          | <i>P</i> -value | OR   | 95%CI |
|---------------|---------------------------------|-----------|-------------|----------------------------------------------|----------------------------------------------|---------------|----------|-----------------|------|-------|
|               |                                 |           |             |                                              |                                              | HBOC ind      | Controls |                 |      |       |
| 3p11.1        | chr3:89485137-89499754          | 14618     | Deletion    | <i>EPHA3</i>                                 | <i>intronic</i>                              | 8             | 0        | 0,051           | Inf  | na    |
| 19q13.41      | chr19:58213912-58240762         | 26851     | Duplication | <i>ERVV-2</i>                                | <i>ERVV-2</i>                                | 7             | 0        | 0,075           | Inf  | na    |
| 15q11.2       | chr15:19788495-19962000         | 173506    | Deletion    | <i>LOC727924,OR4M2,OR4N3P,OR4N4</i>          | <i>LOC727924,OR4M2,OR4N3P,OR4N4</i>          | 6             | 0        | 0,109           | Inf  | na    |
| 5q15          | chr5:97075236-97125076          | 49841     | Deletion    | <i>intergenic</i>                            | <i>intergenic</i>                            | 5             | 0        | 0,160           | Inf  | na    |
| 22q13.1       | chr22:37695722-37715456         | 19735     | Deletion    | <i>APOBEC3A,APOBEC3B</i>                     | <i>APOBEC3B</i>                              | 5             | 0        | 0,160           | Inf  | na    |
| 1p21.1        | chr1:102471625-102616313        | 144689    | Deletion    | <i>MIR548AI</i>                              | <i>MIR548AI</i>                              | 4             | 0        | 0,232           | Inf  | na    |
| 2q35          | chr2:215221675-215254549        | 32875     | Deletion    | <i>intergenic</i>                            | <i>intergenic</i>                            | 4             | 0        | 0,232           | Inf  | na    |
| 7q11.23       | chr7:76325606-76453285          | 127680    | Duplication | <i>PMS2P11</i>                               | <i>PMS2P11</i>                               | 4             | 0        | 0,232           | Inf  | na    |
| 11p11.12      | chr11:51048278-51051138         | 2861      | Deletion    | <i>intergenic</i>                            | <i>intergenic</i>                            | 11            | 3        | 0,337           | 1,67 | na    |
| 14q11.2       | chr14:19283777-19490411         | 206635    | Duplication | <i>OR4K1,OR4K2,OR4K5,OR4M1,OR4N2,OR4Q3</i>   | <i>OR4K1,OR4K2,OR4K5,OR4M1,OR4N2,OR4Q3</i>   | 8             | 2        | 0,370           | 1,80 | na    |
| 13q31.1       | chr13:83009774-83045171         | 35398     | Deletion    | <i>intergenic</i>                            | <i>intergenic</i>                            | 10            | 3        | 0,406           | 1,50 | na    |
| 12p11.21      | chr12:31160567-31292645         | 132079    | Duplication | <i>intergenic</i>                            | <i>intergenic</i>                            | 5             | 1        | 0,412           | 2,22 | na    |
| 19p12         | chr19:20423788-20507201         | 83414     | Deletion    | <i>intergenic</i>                            | <i>intergenic</i>                            | 7             | 2        | 0,453           | 1,56 | na    |
| 1p36.33       | chr1:1610720-1661642            | 50923     | Deletion    | <i>CDK11A,CDK11B,MMP23A,SLC35E2,SLC35E2B</i> | <i>CDK11A,CDK11B,MMP23A,SLC35E2,SLC35E2B</i> | 2             | 0        | 0,486           | Inf  | na    |
| 1p36.22       | chr1:12400493-12438178          | 37686     | Duplication | <i>VPS13D</i>                                | <i>intronic</i>                              | 2             | 0        | 0,486           | Inf  | na    |
| 1p36.22-36.21 | chr1:12496410-12615712          | 119303    | Duplication | <i>DHRS3</i>                                 | <i>DHRS3</i>                                 | 2             | 0        | 0,486           | Inf  | na    |
| 1p36.21       | chr1:12698721-12838434          | 139714    | Duplication | <i>AADACL3,C1orf158,HNRNPCL1,LOC649330,</i>  | <i>AADACL3,C1orf158,HNRNPCL1,LOC649330,</i>  | 2             | 0        | 0,486           | Inf  | na    |

|          |                          |        |             |                                                              |                                                              |    |   |       |      |    |  |
|----------|--------------------------|--------|-------------|--------------------------------------------------------------|--------------------------------------------------------------|----|---|-------|------|----|--|
|          |                          |        |             | <i>PRAMEF1,PRAMEF11,<br/>PRAMEF12</i>                        | <i>PRAMEF1,PRAMEF11,<br/>PRAMEF12</i>                        |    |   |       |      |    |  |
| 1p36.21  | chr1:12789486-12874361   | 84876  | Deletion    | <i>HNRNPCL1,LOC649330,<br/>PRAMEF11,PRAMEF2,<br/>PRAMEF4</i> | <i>HNRNPCL1,LOC649330,<br/>PRAMEF11,PRAMEF2,<br/>PRAMEF4</i> | 2  | 0 | 0,486 | Inf  | na |  |
| 1p33     | chr1:49691764-49762922   | 71159  | Deletion    | <i>AGBL4</i>                                                 | <i>intronic</i>                                              | 2  | 0 | 0,486 | Inf  | na |  |
| 2p16.3   | chr2:51496826-51545910   | 49085  | Deletion    | <i>intergenic</i>                                            | <i>intergenic</i>                                            | 2  | 0 | 0,486 | Inf  | na |  |
| 6p12.1   | chr6:55939140-55954197   | 15058  | Deletion    | <i>intergenic</i>                                            | <i>intergenic</i>                                            | 2  | 0 | 0,486 | Inf  | na |  |
| 8q21.13  | chr8:83435642-83454850   | 19209  | Deletion    | <i>intergenic</i>                                            | <i>intergenic</i>                                            | 2  | 0 | 0,486 | Inf  | na |  |
| 9p24.3   | chr9:196132-234457       | 38326  | Duplication | <i>C9orf66,DOCK8</i>                                         | <i>C9orf66,DOCK8</i>                                         | 2  | 0 | 0,486 | Inf  | na |  |
| 10q21.3  | chr10:67748487-67784487  | 36001  | Deletion    | <i>CTNNA3</i>                                                | <i>intronic</i>                                              | 2  | 0 | 0,486 | Inf  | na |  |
| 14q11.2  | chr14:21845319-21864966  | 19648  | Duplication | <i>intergenic</i>                                            | <i>intergenic</i>                                            | 2  | 0 | 0,486 | Inf  | na |  |
| 15q11.2  | chr15:21606581-21612590  | 6010   | Deletion    | <i>intergenic</i>                                            | <i>intergenic</i>                                            | 2  | 0 | 0,486 | Inf  | na |  |
| 15q11.2  | chr15:22134751-22320561  | 185811 | Duplication | <i>intergenic</i>                                            | <i>intergenic</i>                                            | 2  | 0 | 0,486 | Inf  | na |  |
| 19q13.31 | chr19:48064226-48157011  | 92786  | Duplication | <i>PSG1,PSG6,PSG7</i>                                        | <i>PSG1,PSG6,PSG7</i>                                        | 2  | 0 | 0,486 | Inf  | na |  |
| 1q21.1   | chr1:147305744-147478120 | 172377 | Duplication | <i>intergenic</i>                                            | <i>intergenic</i>                                            | 4  | 1 | 0,523 | 1,76 | na |  |
| 2q34     | chr2:212065237-212124274 | 59038  | Deletion    | <i>ERBB4</i>                                                 | <i>intronic</i>                                              | 5  | 1 | 0,523 | 1,76 | na |  |
| 3q26.1   | chr3:163617384-163625169 | 7786   | Deletion    | <i>intergenic</i>                                            | <i>intergenic</i>                                            | 4  | 1 | 0,523 | 1,76 | na |  |
| 1q21.1   | chr1:147305744-147478120 | 172377 | Deletion    | <i>intergenic</i>                                            | <i>intergenic</i>                                            | 15 | 6 | 0,543 | 1,10 | na |  |
| 7p22.3   | chr7:141322-162448       | 21127  | Duplication | <i>intergenic</i>                                            | <i>intergenic</i>                                            | 3  | 1 | 0,649 | 1,30 | na |  |
| 11p11.12 | chr11:49671841-49709533  | 37693  | Deletion    | <i>LOC440040</i>                                             | <i>intronic</i>                                              | 3  | 1 | 0,649 | 1,30 | na |  |
| 12p13.31 | chr12:7891603-8014573    | 122971 | Duplication | <i>SLC2A14,SLC2A3</i>                                        | <i>SLC2A14,SLC2A3</i>                                        | 3  | 1 | 0,649 | 1,30 | na |  |
| 17p11.2  | chr17:19443475-19478062  | 34588  | Deletion    | <i>intergenic</i>                                            | <i>intergenic</i>                                            | 3  | 1 | 0,649 | 1,30 | na |  |
| 10q11.22 | chr10:47063139-47171576  | 108438 | Duplication | <i>ANTXRL</i>                                                | <i>ANTXRL</i>                                                | 9  | 4 | 0,655 | 0,97 | na |  |
| 1p36.22  | chr1:12341287-12373416   | 32130  | Duplication | <i>VPS13D</i>                                                | <i>VPS13D</i>                                                | 1  | 0 | 0,698 | Inf  | na |  |
| 1p36.11  | chr1:25470863-25515044   | 44182  | Deletion    | <i>RHD</i>                                                   | <i>RHD</i>                                                   | 1  | 0 | 0,698 | Inf  | na |  |
| 1p33     | chr1:49900785-49964737   | 63953  | Deletion    | <i>AGBL4</i>                                                 | <i>AGBL4</i>                                                 | 1  | 0 | 0,698 | Inf  | na |  |
| 1p22.1   | chr1:94402231-94461615   | 59385  | Deletion    | <i>ARHGAP29</i>                                              | <i>ARHGAP29</i>                                              | 1  | 0 | 0,698 | Inf  | na |  |

|        |                          |        |             |                                                                                                 |                                                                                                 |   |   |       |     |    |
|--------|--------------------------|--------|-------------|-------------------------------------------------------------------------------------------------|-------------------------------------------------------------------------------------------------|---|---|-------|-----|----|
| 1q31.3 | chr1:192902103-192948685 | 46583  | Duplication | <i>intergenic</i>                                                                               | <i>intergenic</i>                                                                               | 1 | 0 | 0,698 | Inf | na |
| 1q41   | chr1:216085579-216121310 | 35732  | Deletion    | <i>SPATA17</i>                                                                                  | <i>SPATA17</i>                                                                                  | 1 | 0 | 0,698 | Inf | na |
| 1q42.3 | chr1:234424014-234500747 | 76734  | Deletion    | <i>ERO1LB,GPR137B</i>                                                                           | <i>ERO1LB,GPR137B</i>                                                                           | 1 | 0 | 0,698 | Inf | na |
| 2p21   | chr2:47443538-47460278   | 16741  | Deletion    | <i>EPCAM,MIR559</i>                                                                             | <i>EPCAM,MIR559</i>                                                                             | 1 | 0 | 0,698 | Inf | na |
| 2p16.3 | chr2:49534201-49592865   | 58665  | Deletion    | <i>intergenic</i>                                                                               | <i>intergenic</i>                                                                               | 1 | 0 | 0,698 | Inf | na |
| 2p16.2 | chr2:53256546-53293133   | 36588  | Deletion    | <i>intergenic</i>                                                                               | <i>intergenic</i>                                                                               | 1 | 0 | 0,698 | Inf | na |
| 2p12   | chr2:82899312-82952000   | 52689  | Deletion    | <i>LOC1720</i>                                                                                  | <i>LOC1720</i>                                                                                  | 1 | 0 | 0,698 | Inf | na |
| 2p11.2 | chr2:87482067-87633978   | 151912 | Deletion    | <i>NCRNA00152</i>                                                                               | <i>NCRNA00152</i>                                                                               | 1 | 0 | 0,698 | Inf | na |
| 2q14.1 | chr2:113811749-114209785 | 398037 | Duplication | <i>CBWD2,DDX11L2,<br/>FAM138B,FOXD4L1,<br/>MIR4782,RABL2A,<br/>RPL23AP7,SLC35F5,<br/>WASH2P</i> | <i>CBWD2,DDX11L2,<br/>FAM138B,FOXD4L1,<br/>MIR4782,RABL2A,<br/>RPL23AP7,SLC35F5,<br/>WASH2P</i> | 1 | 0 | 0,698 | Inf | na |
| 2q14.3 | chr2:123502132-123526178 | 24047  | Duplication | <i>intergenic</i>                                                                               | <i>intergenic</i>                                                                               | 1 | 0 | 0,698 | Inf | na |
| 2q14.3 | chr2:123986255-124017655 | 31401  | Deletion    | <i>intergenic</i>                                                                               | <i>intergenic</i>                                                                               | 1 | 0 | 0,698 | Inf | na |
| 2q23.1 | chr2:148968172-149060899 | 92728  | Duplication | <i>MBD5</i>                                                                                     | <i>MBD5</i>                                                                                     | 1 | 0 | 0,698 | Inf | na |
| 2q24.3 | chr2:168227203-168311130 | 83928  | Duplication | <i>intergenic</i>                                                                               | <i>intergenic</i>                                                                               | 1 | 0 | 0,698 | Inf | na |
| 2q31.3 | chr2:181176255-181179083 | 2829   | Duplication | <i>intergenic</i>                                                                               | <i>intergenic</i>                                                                               | 1 | 0 | 0,698 | Inf | na |
| 2q33.1 | chr2:197174006-197209016 | 35011  | Duplication | <i>intergenic</i>                                                                               | <i>intergenic</i>                                                                               | 1 | 0 | 0,698 | Inf | na |
| 2q33.2 | chr2:204163416-204245415 | 82000  | Duplication | <i>intergenic</i>                                                                               | <i>intergenic</i>                                                                               | 1 | 0 | 0,698 | Inf | na |
| 2q33.2 | chr2:204554473-204920874 | 366402 | Duplication | <i>intergenic</i>                                                                               | <i>intergenic</i>                                                                               | 1 | 0 | 0,698 | Inf | na |
| 2q34   | chr2:212404169-212421080 | 16912  | Duplication | <i>ERBB4</i>                                                                                    | <i>intronic</i>                                                                                 | 1 | 0 | 0,698 | Inf | na |
| 2q36.3 | chr2:227941797-227954773 | 12977  | Duplication | <i>TM4SF20</i>                                                                                  | <i>TM4SF20</i>                                                                                  | 1 | 0 | 0,698 | Inf | na |
| 2q37.1 | chr2:232923704-233017792 | 94089  | Duplication | <i>ALPP,ALPPL2,<br/>ECELP2</i>                                                                  | <i>ALPP,ALPPL2,<br/>ECELP2</i>                                                                  | 1 | 0 | 0,698 | Inf | na |
| 3p26.2 | chr3:5375168-5407114     | 31947  | Deletion    | <i>intergenic</i>                                                                               | <i>intergenic</i>                                                                               | 1 | 0 | 0,698 | Inf | na |
| 3p12.3 | chr3:79268774-79482170   | 213397 | Deletion    | <i>ROBO1</i>                                                                                    | <i>intronic</i>                                                                                 | 1 | 0 | 0,698 | Inf | na |
| 3q11.2 | chr3:95114888-95127737   | 12850  | Duplication | <i>PROS1</i>                                                                                    | <i>PROS1</i>                                                                                    | 1 | 0 | 0,698 | Inf | na |

|        |                          |        |             |                                              |                                              |   |   |       |     |    |
|--------|--------------------------|--------|-------------|----------------------------------------------|----------------------------------------------|---|---|-------|-----|----|
| 4p16.3 | chr4:75800-101487        | 25688  | Duplication | <i>ZNF595,ZNF718</i>                         | <i>ZNF595</i>                                | 1 | 0 | 0,698 | Inf | na |
| 4p16.3 | chr4:1930398-1939679     | 9282   | Duplication | <i>WHSC1</i>                                 | <i>WHSC1</i>                                 | 1 | 0 | 0,698 | Inf | na |
| 4p16.1 | chr4:9855546-10028563    | 173018 | Duplication | <i>intergenic</i>                            | <i>intergenic</i>                            | 1 | 0 | 0,698 | Inf | na |
| 4p16.1 | chr4:10156441-10476154   | 319714 | Duplication | <i>CLNK</i>                                  | <i>CLNK</i>                                  | 1 | 0 | 0,698 | Inf | na |
| 4p16.1 | chr4:10568873-10700494   | 131622 | Duplication | <i>intergenic</i>                            | <i>intergenic</i>                            | 1 | 0 | 0,698 | Inf | na |
| 4q12   | chr4:57750017-57789643   | 39627  | Duplication | <i>LOC255130</i>                             | <i>LOC255130</i>                             | 1 | 0 | 0,698 | Inf | na |
| 4q26   | chr4:114584724-114604318 | 19595  | Deletion    | <i>CAMK2D</i>                                | <i>CAMK2D</i>                                | 1 | 0 | 0,698 | Inf | na |
| 4q27   | chr4:120951145-121031754 | 80610  | Deletion    | <i>intergenic</i>                            | <i>intergenic</i>                            | 1 | 0 | 0,698 | Inf | na |
| 4q28.3 | chr4:135282185-135472380 | 190196 | Deletion    | <i>PABPC4L</i>                               | <i>PABPC4L</i>                               | 1 | 0 | 0,698 | Inf | na |
| 4q28.3 | chr4:136477938-136535637 | 57700  | Deletion    | <i>intergenic</i>                            | <i>intergenic</i>                            | 1 | 0 | 0,698 | Inf | na |
| 4q34.3 | chr4:180924994-180984457 | 59464  | Duplication | <i>intergenic</i>                            | <i>intergenic</i>                            | 1 | 0 | 0,698 | Inf | na |
| 5p15.2 | chr5:9546723-10037618    | 490896 | Duplication | <i>LOC285692,SEMA5A,<br/>SNORD123,TAS2R1</i> | <i>LOC285692,SEMA5A,<br/>SNORD123,TAS2R1</i> | 1 | 0 | 0,698 | Inf | na |
| 5p12   | chr5:44401302-44417455   | 16154  | Deletion    | <i>FGF10</i>                                 | <i>intronic</i>                              | 1 | 0 | 0,698 | Inf | na |
| 5q22.1 | chr5:111015566-111030720 | 15155  | Deletion    | <i>LOC100505678</i>                          | <i>intronic</i>                              | 1 | 0 | 0,698 | Inf | na |
| 5q22.3 | chr5:113188389-113199827 | 11439  | Deletion    | <i>intergenic</i>                            | <i>intergenic</i>                            | 1 | 0 | 0,698 | Inf | na |
| 6p25.1 | chr6:5500587-5519318     | 18732  | Deletion    | <i>FARS2</i>                                 | <i>intronic</i>                              | 1 | 0 | 0,698 | Inf | na |
| 6q11.1 | chr6:62247872-62263460   | 15589  | Deletion    | <i>intergenic</i>                            | <i>intergenic</i>                            | 1 | 0 | 0,698 | Inf | na |
| 6q12   | chr6:69294028-69298741   | 4714   | Duplication | <i>intergenic</i>                            | <i>intergenic</i>                            | 1 | 0 | 0,698 | Inf | na |
| 6q16.1 | chr6:95424156-95654462   | 230307 | Duplication | <i>intergenic</i>                            | <i>intergenic</i>                            | 1 | 0 | 0,698 | Inf | na |
| 6q24.3 | chr6:147657403-147677913 | 20511  | Deletion    | <i>STXBP5</i>                                | <i>STXBP5</i>                                | 1 | 0 | 0,698 | Inf | na |
| 6q26   | chr6:162077850-162413672 | 335823 | Duplication | <i>PARK2</i>                                 | <i>PARK2</i>                                 | 1 | 0 | 0,698 | Inf | na |
| 6q27   | chr6:168092781-168153571 | 60791  | Duplication | <i>HGC6.3,MLLT4</i>                          | <i>HGC6.3,MLLT4</i>                          | 1 | 0 | 0,698 | Inf | na |
| 6q27   | chr6:168240295-168334983 | 94689  | Duplication | <i>intergenic</i>                            | <i>intergenic</i>                            | 1 | 0 | 0,698 | Inf | na |
| 7p21.3 | chr7:9094595-9184546     | 89952  | Deletion    | <i>intergenic</i>                            | <i>intergenic</i>                            | 1 | 0 | 0,698 | Inf | na |
| 7p21.3 | chr7:12759886-12788046   | 28161  | Deletion    | <i>intergenic</i>                            | <i>intergenic</i>                            | 1 | 0 | 0,698 | Inf | na |
| 7p15.1 | chr7:29175886-29503232   | 327347 | Duplication | <i>CHN2</i>                                  | <i>CHN2</i>                                  | 1 | 0 | 0,698 | Inf | na |
| 7p15.1 | chr7:29657963-29738663   | 80701  | Duplication | <i>DPY19L2P3,</i>                            | <i>DPY19L2P3,</i>                            | 1 | 0 | 0,698 | Inf | na |

|         |                          |        |             | <i>LOC100271874,</i><br><i>LOC646762,MIR550A3</i> | <i>LOC100271874,</i><br><i>LOC646762,MIR550A3</i> |   |   |       |     |    |
|---------|--------------------------|--------|-------------|---------------------------------------------------|---------------------------------------------------|---|---|-------|-----|----|
| 7p11.1  | chr7:57495829-57524352   | 28524  | Duplication | <i>ZNF716</i>                                     | <i>ZNF716</i>                                     | 1 | 0 | 0,698 | Inf | na |
| 7q11.21 | chr7:61726313-62326882   | 600570 | Duplication | <i>intergenic</i>                                 | <i>intergenic</i>                                 | 1 | 0 | 0,698 | Inf | na |
| 7q11.23 | chr7:75955687-76046149   | 90463  | Deletion    | <i>DTX2,LOC100133091,</i><br><i>UPK3B</i>         | <i>DTX2,LOC100133091,</i><br><i>UPK3B</i>         | 1 | 0 | 0,698 | Inf | na |
| 7q11.23 | chr7:76126917-76395148   | 268232 | Deletion    | <i>intergenic</i>                                 | <i>intergenic</i>                                 | 1 | 0 | 0,698 | Inf | na |
| 7q21.11 | chr7:83368001-83386968   | 18968  | Deletion    | <i>intergenic</i>                                 | <i>intergenic</i>                                 | 1 | 0 | 0,698 | Inf | na |
| 7q31.33 | chr7:125937399-126382296 | 444898 | Deletion    | <i>GRM8</i>                                       | <i>GRM8</i>                                       | 1 | 0 | 0,698 | Inf | na |
| 7q34    | chr7:139716847-139754565 | 37719  | Duplication | <i>RAB19,SLC37A3</i>                              | <i>RAB19,SLC37A3</i>                              | 1 | 0 | 0,698 | Inf | na |
| 8p23.3  | chr8:390600-401865       | 11266  | Deletion    | <i>FBXO25</i>                                     | <i>FBXO25</i>                                     | 1 | 0 | 0,698 | Inf | na |
| 8p23.2  | chr8:3104658-3115506     | 10849  | Deletion    | <i>CSMD1</i>                                      | <i>intronic</i>                                   | 1 | 0 | 0,698 | Inf | na |
| 8p22    | chr8:15447307-15453141   | 5835   | Deletion    | <i>TUSC3</i>                                      | <i>intronic</i>                                   | 1 | 0 | 0,698 | Inf | na |
| 8p22    | chr8:16010913-16070335   | 59423  | Duplication | <i>MSRI</i>                                       | <i>MSRI</i>                                       | 1 | 0 | 0,698 | Inf | na |
| 8p22    | chr8:16460780-16569399   | 108620 | Deletion    | <i>intergenic</i>                                 | <i>intergenic</i>                                 | 1 | 0 | 0,698 | Inf | na |
| 8p21.2  | chr8:25588245-25613879   | 25635  | Deletion    | <i>intergenic</i>                                 | <i>intergenic</i>                                 | 1 | 0 | 0,698 | Inf | na |
| 8q11.21 | chr8:48397832-48770320   | 372489 | Deletion    | <i>KIAA0146</i>                                   | <i>KIAA0146</i>                                   | 1 | 0 | 0,698 | Inf | na |
| 8q21.3  | chr8:87314369-87346691   | 32323  | Duplication | <i>intergenic</i>                                 | <i>intergenic</i>                                 | 1 | 0 | 0,698 | Inf | na |
| 8q22.1  | chr8:96549164-96574761   | 25598  | Deletion    | <i>intergenic</i>                                 | <i>intergenic</i>                                 | 1 | 0 | 0,698 | Inf | na |
| 8q24.23 | chr8:137799462-137917498 | 118037 | Deletion    | <i>intergenic</i>                                 | <i>intergenic</i>                                 | 1 | 0 | 0,698 | Inf | na |
| 9p24.3  | chr9:386380-468153       | 81774  | Duplication | <i>DOCK8</i>                                      | <i>DOCK8</i>                                      | 1 | 0 | 0,698 | Inf | na |
| 9p24.3  | chr9:547617-702156       | 154540 | Duplication | <i>KANK1</i>                                      | <i>KANK1</i>                                      | 1 | 0 | 0,698 | Inf | na |
| 9p24.2  | chr9:4133590-4216155     | 82566  | Duplication | <i>GLIS3</i>                                      | <i>GLIS3</i>                                      | 1 | 0 | 0,698 | Inf | na |
| 9p24.2  | chr9:4313880-4536594     | 222715 | Duplication | <i>SLC1A1</i>                                     | <i>SLC1A1</i>                                     | 1 | 0 | 0,698 | Inf | na |
| 9p24.1  | chr9:7710636-7726266     | 15631  | Deletion    | <i>intergenic</i>                                 | <i>intergenic</i>                                 | 1 | 0 | 0,698 | Inf | na |
| 9p23    | chr9:12275170-12387876   | 112707 | Deletion    | <i>intergenic</i>                                 | <i>intergenic</i>                                 | 1 | 0 | 0,698 | Inf | na |
| 9p21.1  | chr9:29564928-29578006   | 13079  | Duplication | <i>intergenic</i>                                 | <i>intergenic</i>                                 | 1 | 0 | 0,698 | Inf | na |
| 9p12    | chr9:40772561-40795149   | 22589  | Duplication | <i>ZNF658</i>                                     | <i>ZNF658</i>                                     | 1 | 0 | 0,698 | Inf | na |

|          |                           |        |             |                                  |                                  |   |   |       |     |    |
|----------|---------------------------|--------|-------------|----------------------------------|----------------------------------|---|---|-------|-----|----|
| 9q34.2   | chr9:134939063-134947273  | 8211   | Duplication | <i>intergenic</i>                | <i>intergenic</i>                | 1 | 0 | 0,698 | Inf | na |
| 9q34.3   | chr9:139662199-139714736  | 52538  | Deletion    | <i>EHMT1</i>                     | <i>intronic</i>                  | 1 | 0 | 0,698 | Inf | na |
| 10p12.31 | chr10:20836645-20896007   | 59363  | Deletion    | <i>MIR4675</i>                   | <i>MIR4675</i>                   | 1 | 0 | 0,698 | Inf | na |
| 10q11.21 | chr10:42130789-42147957   | 17169  | Deletion    | <i>LOC441666</i>                 | <i>LOC441666</i>                 | 1 | 0 | 0,698 | Inf | na |
| 10q11.22 | chr10:47066810-47122505   | 55696  | Deletion    | <i>intergenic</i>                | <i>intergenic</i>                | 1 | 0 | 0,698 | Inf | na |
| 10q11.23 | chr10:51743485-51778836   | 35352  | Duplication | <i>SGMS1</i>                     | <i>SGMS1</i>                     | 1 | 0 | 0,698 | Inf | na |
| 10q21.1  | chr10:59142586-59157369   | 14784  | Deletion    | <i>intergenic</i>                | <i>intergenic</i>                | 1 | 0 | 0,698 | Inf | na |
| 10q23.31 | chr10:90935788-90967674   | 31887  | Deletion    | <i>CH25H,LIPA</i>                | <i>CH25H,LIPA</i>                | 1 | 0 | 0,698 | Inf | na |
| 10q25.1  | chr10:111192827-111223756 | 30930  | Deletion    | <i>intergenic</i>                | <i>intergenic</i>                | 1 | 0 | 0,698 | Inf | na |
| 10q26.3  | chr10:135108137-135215135 | 106999 | Duplication | <i>CYP2E1,LOC619207</i>          | <i>CYP2E1,LOC619207</i>          | 1 | 0 | 0,698 | Inf | na |
| 11p14.2  | chr11:26975202-27192291   | 217090 | Deletion    | <i>BBOX1,FIBIN</i>               | <i>BBOX1,FIBIN</i>               | 1 | 0 | 0,698 | Inf | na |
| 11p12    | chr11:42371142-42390602   | 19461  | Deletion    | <i>intergenic</i>                | <i>intergenic</i>                | 1 | 0 | 0,698 | Inf | na |
| 11q14.3  | chr11:88173062-88197639   | 24578  | Deletion    | <i>GRM5</i>                      | <i>intronic</i>                  | 1 | 0 | 0,698 | Inf | na |
| 11q22.1  | chr11:99050585-99071992   | 21408  | Deletion    | <i>CNTN5</i>                     | <i>intronic</i>                  | 1 | 0 | 0,698 | Inf | na |
| 12p13.33 | chr12:2115897-2127756     | 11860  | Deletion    | <i>CACNA1C</i>                   | <i>intronic</i>                  | 1 | 0 | 0,698 | Inf | na |
| 12p13.31 | chr12:7760305-7813713     | 53409  | Duplication | <i>CLEC4C,DPPA3,<br/>NANOGNB</i> | <i>CLEC4C,DPPA3,<br/>NANOGNB</i> | 1 | 0 | 0,698 | Inf | na |
| 12p11.21 | chr12:31903733-31945102   | 41370  | Duplication | <i>intergenic</i>                | <i>intergenic</i>                | 1 | 0 | 0,698 | Inf | na |
| 12q13.11 | chr12:46754919-46788367   | 33449  | Deletion    | <i>PFKM,SENPI</i>                | <i>PFKM,SENPI</i>                | 1 | 0 | 0,698 | Inf | na |
| 12q21.32 | chr12:86033572-86059855   | 26284  | Deletion    | <i>intergenic</i>                | <i>intergenic</i>                | 1 | 0 | 0,698 | Inf | na |
| 12q23.1  | chr12:98810523-98978308   | 167786 | Duplication | <i>ANKS1B,UHRF1BP1L</i>          | <i>ANKS1B,UHRF1BP1L</i>          | 1 | 0 | 0,698 | Inf | na |
| 12q24.32 | chr12:127794827-127820542 | 25716  | Duplication | <i>intergenic</i>                | <i>intergenic</i>                | 1 | 0 | 0,698 | Inf | na |
| 13q12.11 | chr13:18775547-18801159   | 25613  | Deletion    | <i>ANKRD26P3</i>                 | <i>ANKRD26P3</i>                 | 1 | 0 | 0,698 | Inf | na |
| 14q21.3  | chr14:45221032-45408005   | 186974 | Deletion    | <i>intergenic</i>                | <i>intergenic</i>                | 1 | 0 | 0,698 | Inf | na |
| 14q23.2  | chr14:62851917-62869550   | 17634  | Duplication | <i>GPHB5</i>                     | <i>GPHB5</i>                     | 1 | 0 | 0,698 | Inf | na |
| 14q32.2  | chr14:100339346-100351176 | 11831  | Duplication | <i>MIR2392</i>                   | <i>MIR2392</i>                   | 1 | 0 | 0,698 | Inf | na |
| 15q11.2  | chr15:19416328-19535289   | 118962 | Deletion    | <i>LOC348120</i>                 | <i>LOC348120</i>                 | 1 | 0 | 0,698 | Inf | na |
| 15q11.2  | chr15:20648362-20667673   | 19312  | Deletion    | <i>LOC283683</i>                 | <i>LOC283683</i>                 | 1 | 0 | 0,698 | Inf | na |

|          |                           |        |             |                                                                                                  |                                                                                                  |   |   |       |     |    |
|----------|---------------------------|--------|-------------|--------------------------------------------------------------------------------------------------|--------------------------------------------------------------------------------------------------|---|---|-------|-----|----|
| 15q13.2  | chr15:28737821-28751864   | 14044  | Deletion    | <i>LOC100288637</i>                                                                              | <i>LOC100288637</i>                                                                              | 1 | 0 | 0,698 | Inf | na |
| 15q13.3  | chr15:29827425-30300468   | 473044 | Duplication | <i>CHRNA7</i>                                                                                    | <i>CHRNA7</i>                                                                                    | 1 | 0 | 0,698 | Inf | na |
| 15q26.1  | chr15:88554759-88615668   | 60910  | Duplication | <i>C15orf58,CIB1,</i><br><i>NGRN,SEMA4B,</i>                                                     | <i>C15orf58,CIB1,</i><br><i>NGRN,SEMA4B,</i>                                                     | 1 | 0 | 0,698 | Inf | na |
| 15q26.1  | chr15:88685795-89010437   | 324643 | Duplication | <i>TLLI3CRTC3,</i><br><i>GABARAPL3,IQGAPI,</i><br><i>ZNF774</i>                                  | <i>TLLI3CRTC3,</i><br><i>GABARAPL3,IQGAPI,</i><br><i>ZNF774</i>                                  | 1 | 0 | 0,698 | Inf | na |
| 15q26.3  | chr15:99865379-99923316   | 57938  | Duplication | <i>intergenic</i>                                                                                | <i>intergenic</i>                                                                                | 1 | 0 | 0,698 | Inf | na |
| 15q26.3  | chr15:100052984-100105994 | 53011  | Duplication | <i>TARSL2</i>                                                                                    | <i>TARSL2</i>                                                                                    | 1 | 0 | 0,698 | Inf | na |
| 15q26.3  | chr15:100182356-100215359 | 33004  | Duplication | <i>GPCRLTM7</i>                                                                                  | <i>GPCRLTM7</i>                                                                                  | 1 | 0 | 0,698 | Inf | na |
| 16p13.2  | chr16:9109471-9161662     | 52192  | Duplication | <i>C16orf72</i>                                                                                  | <i>C16orf72</i>                                                                                  | 1 | 0 | 0,698 | Inf | na |
| 16p13.13 | chr16:11397652-11543807   | 146156 | Deletion    | <i>intergenic</i>                                                                                | <i>intergenic</i>                                                                                | 1 | 0 | 0,698 | Inf | na |
| 16p11.2  | chr16:28733106-28825145   | 92040  | Duplication | <i>ATP2A1,ATXN2L,</i><br><i>MIR4721,RABEP2,</i><br><i>SH2B1,TUFM</i>                             | <i>ATP2A1,ATXN2L,</i><br><i>MIR4721,RABEP2,</i><br><i>SH2B1,TUFM</i>                             | 1 | 0 | 0,698 | Inf | na |
| 16p11.2  | chr16:28895770-28933479   | 37710  | Duplication | <i>LAT,SPNS1</i>                                                                                 | <i>LAT,SPNS1</i>                                                                                 | 1 | 0 | 0,698 | Inf | na |
| 16q23.1  | chr16:76607720-76622989   | 15270  | Deletion    | <i>CLEC3A</i>                                                                                    | <i>CLEC3A</i>                                                                                    | 1 | 0 | 0,698 | Inf | na |
| 17p13.3  | chr17:954290-1006780      | 52491  | Duplication | <i>ABR</i>                                                                                       | <i>ABR</i>                                                                                       | 1 | 0 | 0,698 | Inf | na |
| 17p13.3  | chr17:1136077-1201625     | 65549  | Duplication | <i>TUSC5,YWHAE</i>                                                                               | <i>TUSC5,YWHAE</i>                                                                               | 1 | 0 | 0,698 | Inf | na |
| 17p13.1  | chr17:9908739-9977572     | 68834  | Deletion    | <i>GAS7</i>                                                                                      | <i>NOT_FOUND</i>                                                                                 | 1 | 0 | 0,698 | Inf | na |
| 17q12    | chr17:30725132-30791060   | 65929  | Deletion    | <i>SLFN12,SLFN13</i>                                                                             | <i>SLFN12,SLFN13</i>                                                                             | 1 | 0 | 0,698 | Inf | na |
| 17q12    | chr17:31889664-31992082   | 102419 | Duplication | <i>GGNBP2,MYO19,</i><br><i>PIGW,ZNHIT3</i>                                                       | <i>GGNBP2,MYO19,</i><br><i>PIGW,ZNHIT3</i>                                                       | 1 | 0 | 0,698 | Inf | na |
| 17q12    | chr17:32069090-32317483   | 248394 | Duplication | <i>intergenic</i>                                                                                | <i>intergenic</i>                                                                                | 1 | 0 | 0,698 | Inf | na |
| 17q12    | chr17:32488438-33302932   | 814495 | Duplication | <i>ACACA,C17orf78,</i><br><i>DDX52,DUSP14,</i><br><i>HNFB1,LOC284100,</i><br><i>SYNRG,TADA2A</i> | <i>ACACA,C17orf78,</i><br><i>DDX52,DUSP14,</i><br><i>HNFB1,LOC284100,</i><br><i>SYNRG,TADA2A</i> | 1 | 0 | 0,698 | Inf | na |

|          |                         |        |             |                                                                                                                                                              |                                                                                                                                                              |   |   |       |      |    |
|----------|-------------------------|--------|-------------|--------------------------------------------------------------------------------------------------------------------------------------------------------------|--------------------------------------------------------------------------------------------------------------------------------------------------------------|---|---|-------|------|----|
| 17q21.31 | chr17:38486384-38585342 | 98959  | Deletion    | <i>BRCA1,NBR1,NBR2</i>                                                                                                                                       | <i>BRCA1,NBR1,NBR2</i>                                                                                                                                       | 1 | 0 | 0,698 | Inf  | na |
| 17q25.1  | chr17:69347869-69516090 | 168222 | Duplication | <i>intergenic</i>                                                                                                                                            | <i>intergenic</i>                                                                                                                                            | 1 | 0 | 0,698 | Inf  | na |
| 17q25.1  | chr17:69608379-69666897 | 58519  | Duplication | <i>intergenic</i>                                                                                                                                            | <i>intergenic</i>                                                                                                                                            | 1 | 0 | 0,698 | Inf  | na |
| 17q25.1  | chr17:69757224-69885849 | 128626 | Duplication | <i>BTBD17,DNAI2,<br/>GPR142,KIF19,TTYH2</i>                                                                                                                  | <i>BTBD17,DNAI2,<br/>GPR142,KIF19,TTYH2</i>                                                                                                                  | 1 | 0 | 0,698 | Inf  | na |
| 17q25.1  | chr17:69983674-70130820 | 147147 | Duplication | <i>C17orf77,CD300A,<br/>CD300C,CD300E,<br/>CD300LB,CD300LD</i>                                                                                               | <i>C17orf77,CD300A,<br/>CD300C,CD300E,<br/>CD300LB,CD300LD</i>                                                                                               | 1 | 0 | 0,698 | Inf  | na |
| 18q22.1  | chr18:62718985-62747566 | 28582  | Duplication | <i>intergenic</i>                                                                                                                                            | <i>intergenic</i>                                                                                                                                            | 1 | 0 | 0,698 | Inf  | na |
| 19p12    | chr19:20493452-20523385 | 29934  | Deletion    | <i>ZNF737</i>                                                                                                                                                | <i>ZNF737</i>                                                                                                                                                | 1 | 0 | 0,698 | Inf  | na |
| 19p12    | chr19:20664930-20717774 | 52845  | Duplication | <i>intergenic</i>                                                                                                                                            | <i>intergenic</i>                                                                                                                                            | 1 | 0 | 0,698 | Inf  | na |
| 19q13.31 | chr19:48064226-48157011 | 92786  | Deletion    | <i>PSG1,PSG6,PSG7</i>                                                                                                                                        | <i>PSG1,PSG6,PSG7</i>                                                                                                                                        | 1 | 0 | 0,698 | Inf  | na |
| 19q13.41 | chr19:58624107-58687562 | 63456  | Duplication | <i>LOC147804,<br/>ZNF761,ZNF813</i>                                                                                                                          | <i>LOC147804,<br/>ZNF761,ZNF813</i>                                                                                                                          | 1 | 0 | 0,698 | Inf  | na |
| 20p12.1  | chr20:14754577-14765018 | 10442  | Deletion    | <i>MACROD2</i>                                                                                                                                               | <i>intronic</i>                                                                                                                                              | 1 | 0 | 0,698 | Inf  | na |
| 20p11.21 | chr20:23630133-23670319 | 40187  | Duplication | <i>intergenic</i>                                                                                                                                            | <i>intergenic</i>                                                                                                                                            | 1 | 0 | 0,698 | Inf  | na |
| 20q11.21 | chr20:29306843-29745884 | 439042 | Duplication | <i>BCL2L1,COX4I2,DEFB115,<br/>DEFB116,DEFB118,<br/>DEFB119,DEFB121,<br/>DEFB122,DEFB123,<br/>DEFB124,HM13,ID1,<br/>MIR3193,NCRNA00028,<br/>PSIMCT-1,REM1</i> | <i>BCL2L1,COX4I2,DEFB115,<br/>DEFB116,DEFB118,<br/>DEFB119,DEFB121,<br/>DEFB122,DEFB123,<br/>DEFB124,HM13,ID1,<br/>MIR3193,NCRNA00028,<br/>PSIMCT-1,REM1</i> | 1 | 0 | 0,698 | Inf  | na |
| 21q21.1  | chr21:19634654-19682955 | 48302  | Deletion    | <i>intergenic</i>                                                                                                                                            | <i>intergenic</i>                                                                                                                                            | 1 | 0 | 0,698 | Inf  | na |
| 21q22.12 | chr21:36508747-36530895 | 22149  | Duplication | <i>DOPEY2</i>                                                                                                                                                | <i>DOPEY2</i>                                                                                                                                                | 1 | 0 | 0,698 | Inf  | na |
| 22q11.22 | chr22:21039509-21061758 | 22250  | Deletion    | <i>intergenic</i>                                                                                                                                            | <i>intergenic</i>                                                                                                                                            | 1 | 0 | 0,698 | Inf  | na |
| 22q11.23 | chr22:24077300-24173884 | 96585  | Duplication | <i>LRP5L</i>                                                                                                                                                 | <i>LRP5L</i>                                                                                                                                                 | 1 | 0 | 0,698 | Inf  | na |
| 15q14    | chr15:32505886-32595143 | 89258  | Deletion    | <i>GOLGA8A</i>                                                                                                                                               | <i>GOLGA8A</i>                                                                                                                                               | 8 | 4 | 0,728 | 0,85 | na |



|          |                           |         |             |                                                                 |                                                                 |   |   |       |      |    |
|----------|---------------------------|---------|-------------|-----------------------------------------------------------------|-----------------------------------------------------------------|---|---|-------|------|----|
| 8p23.2   | chr8:5588599-5591903      | 3305    | Deletion    | <i>intergenic</i>                                               | <i>intergenic</i>                                               | 6 | 3 | 0,732 | 0,85 | na |
| 2q37.3   | chr2:242566407-242669396  | 102990  | Deletion    | <i>intergenic</i>                                               | <i>intergenic</i>                                               | 4 | 2 | 0,745 | 0,86 | na |
| 17q21.31 | chr17:41525626-41725112   | 199487  | Duplication | <i>KIAA1267,LOC644246</i>                                       | <i>KIAA1267,LOC644246</i>                                       | 4 | 2 | 0,745 | 0,86 | na |
| 1p36.33  | chr1:1610720-1670079      | 59360   | Duplication | <i>CDK11A,CDK11B,<br/>MMP23A,SLC35E2,<br/>SLC35E2B</i>          | <i>CDK11A,CDK11B,<br/>MMP23A,SLC35E2,<br/>SLC35E2B</i>          | 2 | 1 | 0,784 | 0,86 | na |
| 4q32.2   | chr4:162173179-162211190  | 38012   | Duplication | <i>intergenic</i>                                               | <i>intergenic</i>                                               | 2 | 1 | 0,784 | 0,86 | na |
| 11q22.3  | chr11:107158291-107175438 | 17148   | Duplication | <i>SLC35F2</i>                                                  | <i>SLC35F2</i>                                                  | 2 | 1 | 0,784 | 0,86 | na |
| 12q24.33 | chr12:130296270-130654881 | 358612  | Deletion    | <i>intergenic</i>                                               | <i>intergenic</i>                                               | 2 | 1 | 0,784 | 0,86 | na |
| 16p13.3  | chr16:2639305-2665257     | 25953   | Duplication | <i>LOC100507321</i>                                             | <i>LOC100507321</i>                                             | 2 | 1 | 0,784 | 0,86 | na |
| 17q12    | chr17:31462326-31486394   | 24069   | Duplication | <i>intergenic</i>                                               | <i>intergenic</i>                                               | 2 | 1 | 0,784 | 0,86 | na |
| 2p11.2   | chr2:88517095-89885025    | 1367931 | Deletion    | <i>ANKRD36BP2,C2orf51,<br/>EIF2AK3,FOXI3,<br/>MIR4436A,RPIA</i> | <i>ANKRD36BP2,C2orf51,<br/>EIF2AK3,FOXI3,<br/>MIR4436A,RPIA</i> | 9 | 5 | 0,789 | 0,75 | na |
| 18q22.1  | chr18:63441694-63819775   | 378082  | Duplication | <i>LOC643542</i>                                                | <i>LOC643542</i>                                                | 3 | 2 | 0,839 | 0,64 | na |
| 15q13.3  | chr15:30297184-30302973   | 5790    | Deletion    | <i>intergenic</i>                                               | <i>intergenic</i>                                               | 4 | 3 | 0,879 | 0,56 | na |
| 2p11.2   | chr2:87297688-87730750    | 433063  | Duplication | <i>MIR4435-1,MIR4435-2,<br/>NCRNA00152</i>                      | <i>MIR4435-1,MIR4435-2,<br/>NCRNA00152</i>                      | 1 | 1 | 0,911 | 0,43 | na |
| 3p25.3   | chr3:8795732-8832963      | 37232   | Duplication | <i>intergenic</i>                                               | <i>intergenic</i>                                               | 1 | 1 | 0,911 | 0,43 | na |
| 5p13.3   | chr5:32144879-32192845    | 47967   | Duplication | <i>GOLPH3,PDZD2</i>                                             | <i>GOLPH3,PDZD2</i>                                             | 1 | 1 | 0,911 | 0,43 | na |
| 5q35.3   | chr5:180109103-180122934  | 13832   | Duplication | <i>intergenic</i>                                               | <i>intergenic</i>                                               | 1 | 1 | 0,911 | 0,43 | na |
| 7q11.21  | chr7:64316996-64578888    | 261893  | Deletion    | <i>INTS4L1,ZNF92</i>                                            | <i>INTS4L1,ZNF92</i>                                            | 1 | 1 | 0,911 | 0,43 | na |
| 7q36.2   | chr7:153158237-153351823  | 193587  | Duplication | <i>DPP6</i>                                                     | <i>DPP6</i>                                                     | 1 | 1 | 0,911 | 0,43 | na |
| 8p23.2   | chr8:5237494-5276363      | 38870   | Deletion    | <i>intergenic</i>                                               | <i>intergenic</i>                                               | 1 | 1 | 0,911 | 0,43 | na |
| 11q22.1  | chr11:99428851-99459737   | 30887   | Deletion    | <i>CNTN5</i>                                                    | <i>CNTN5</i>                                                    | 1 | 1 | 0,911 | 0,43 | na |
| 12q21.31 | chr12:81696067-81727873   | 31807   | Deletion    | <i>TMTC2</i>                                                    | <i>intronic</i>                                                 | 1 | 1 | 0,911 | 0,43 | na |
| 13q32.1  | chr13:94797740-94825409   | 27670   | Duplication | <i>intergenic</i>                                               | <i>intergenic</i>                                               | 1 | 1 | 0,911 | 0,43 | na |
| 15q11.2  | chr15:18811257-19170114   | 358858  | Deletion    | <i>GOLGA6L6,GOLGA8C,</i>                                        | <i>GOLGA6L6,GOLGA8C,</i>                                        | 1 | 1 | 0,911 | 0,43 | na |

|          |                          |         |             | <i>HERC2P3,NBEAP1</i>                                                                                                                       | <i>HERC2P3,NBEAP1</i>                                                                                                                       |    |   |       |      |    |
|----------|--------------------------|---------|-------------|---------------------------------------------------------------------------------------------------------------------------------------------|---------------------------------------------------------------------------------------------------------------------------------------------|----|---|-------|------|----|
| 15q11.2  | chr15:21937716-21984609  | 46894   | Deletion    | <i>PWRN2</i>                                                                                                                                | <i>PWRN2</i>                                                                                                                                | 1  | 1 | 0,911 | 0,43 | na |
| 15q26.3  | chr15:98730436-98770528  | 40093   | Deletion    | <i>LASS3</i>                                                                                                                                | <i>LASS3</i>                                                                                                                                | 1  | 1 | 0,911 | 0,43 | na |
| 19p13.3  | chr19:4826708-4861889    | 35182   | Duplication | <i>ARRDC5,UHRF1</i>                                                                                                                         | <i>ARRDC5,UHRF1</i>                                                                                                                         | 1  | 1 | 0,911 | 0,43 | na |
| 22q11.22 | chr22:20644463-20903637  | 259175  | Duplication | <i>TOP3B</i>                                                                                                                                | <i>TOP3B</i>                                                                                                                                | 1  | 1 | 0,911 | 0,43 | na |
| 19q13.42 | chr19:60018551-60069023  | 50473   | Deletion    | <i>KIR2DS4,KIR3DL1,<br/>KIR3DL2</i>                                                                                                         | <i>KIR2DS4,KIR3DL1,<br/>KIR3DL2</i>                                                                                                         | 2  | 2 | 0,919 | 0,42 | na |
| 8q21.3   | chr8:92192384-92252834   | 60451   | Deletion    | <i>LRRC69</i>                                                                                                                               | <i>LRRC69</i>                                                                                                                               | 4  | 4 | 0,947 | 0,41 | na |
| 15q11.2  | chr15:18788040-20077482  | 1289443 | Duplication | <i>CXADRP2,GOLGA6L6,<br/>GOLGA8C,HERC2P3,<br/>LOC348120,LOC646214,<br/>LOC727924,NBEAP1,<br/>NF1P1,OR4M2,OR4N3P,<br/>OR4N4,POTEB,REREP3</i> | <i>CXADRP2,GOLGA6L6,<br/>GOLGA8C,HERC2P3,<br/>LOC348120,LOC646214,<br/>LOC727924,NBEAP1,<br/>NF1P1,OR4M2,OR4N3P,<br/>OR4N4,POTEB,REREP3</i> | 12 | 9 | 0,949 | 0,51 | na |
| 5q21.1   | chr5:101056643-101125626 | 68984   | Duplication | <i>intergenic</i>                                                                                                                           | <i>intergenic</i>                                                                                                                           | 2  | 3 | 0,972 | 0,27 | na |
| 2p22.3   | chr2:35676878-35937068   | 260191  | Deletion    | <i>intergenic</i>                                                                                                                           | <i>intergenic</i>                                                                                                                           | 1  | 2 | 0,974 | 0,21 | na |
| 18p11.32 | chr18:1898848-1962346    | 63499   | Deletion    | <i>intergenic</i>                                                                                                                           | <i>intergenic</i>                                                                                                                           | 1  | 2 | 0,974 | 0,21 | na |
| 22q11.23 | chr22:24056992-24234257  | 177266  | Deletion    | <i>CRYBB2P1,LRP5L</i>                                                                                                                       | <i>CRYBB2P1,LRP5L</i>                                                                                                                       | 1  | 2 | 0,974 | 0,21 | na |
| 1p21.1   | chr1:105355887-105446771 | 90885   | Deletion    | <i>MIR548H3</i>                                                                                                                             | <i>intronic</i>                                                                                                                             | 0  | 1 | 1,000 | 0,00 | na |
| 1q25.1   | chr1:171328672-171372037 | 43366   | Deletion    | <i>intergenic</i>                                                                                                                           | <i>intergenic</i>                                                                                                                           | 0  | 1 | 1,000 | 0,00 | na |
| 1q31.2   | chr1:190131723-190142375 | 10653   | Deletion    | <i>intergenic</i>                                                                                                                           | <i>intergenic</i>                                                                                                                           | 0  | 1 | 1,000 | 0,00 | na |
| 1q31.2   | chr1:190619399-190639297 | 19899   | Duplication | <i>intergenic</i>                                                                                                                           | <i>intergenic</i>                                                                                                                           | 0  | 1 | 1,000 | 0,00 | na |
| 1q31.3   | chr1:194918368-194951248 | 32881   | Deletion    | <i>CFH</i>                                                                                                                                  | <i>CFH</i>                                                                                                                                  | 0  | 1 | 1,000 | 0,00 | na |
| 1q32.1   | chr1:201975657-202015893 | 40237   | Duplication | <i>ATP2B4,LAX1</i>                                                                                                                          | <i>ATP2B4,LAX1</i>                                                                                                                          | 0  | 1 | 1,000 | 0,00 | na |
| 2p12     | chr2:76936360-76972854   | 36495   | Deletion    | <i>LRRTM4</i>                                                                                                                               | <i>intronic</i>                                                                                                                             | 0  | 1 | 1,000 | 0,00 | na |
| 2p11.2   | chr2:88517095-88520452   | 3358    | Deletion    | <i>intergenic</i>                                                                                                                           | <i>intergenic</i>                                                                                                                           | 0  | 1 | 1,000 | 0,00 | na |
| 2q23.3   | chr2:154204396-154269871 | 65476   | Deletion    | <i>intergenic</i>                                                                                                                           | <i>intergenic</i>                                                                                                                           | 0  | 1 | 1,000 | 0,00 | na |
| 3p22.2   | chr3:37473214-37490345   | 17132   | Duplication | <i>ITGA9</i>                                                                                                                                | <i>ITGA9</i>                                                                                                                                | 0  | 1 | 1,000 | 0,00 | na |

|          |                           |        |             |                           |                           |   |   |       |      |    |
|----------|---------------------------|--------|-------------|---------------------------|---------------------------|---|---|-------|------|----|
| 3q29     | chr3:193934412-193998204  | 63793  | Duplication | <i>MB21D2</i>             | <i>MB21D2</i>             | 0 | 1 | 1,000 | 0,00 | na |
| 4p16.3   | chr4:2423474-2435102      | 11629  | Duplication | <i>LOC402160</i>          | <i>LOC402160</i>          | 0 | 1 | 1,000 | 0,00 | na |
| 4p12     | chr4:47865426-47884898    | 19473  | Duplication | <i>TEC</i>                | <i>TEC</i>                | 0 | 1 | 1,000 | 0,00 | na |
| 4q32.1   | chr4:160321804-160588615  | 266812 | Duplication | <i>RAPGEF2</i>            | <i>RAPGEF2</i>            | 0 | 1 | 1,000 | 0,00 | na |
| 4q32.3   | chr4:164530235-164566231  | 35997  | Deletion    | <i>intergenic</i>         | <i>intergenic</i>         | 0 | 1 | 1,000 | 0,00 | na |
| 5q35.3   | chr5:178661436-178705647  | 44212  | Duplication | <i>ADAMTS2</i>            | <i>ADAMTS2</i>            | 0 | 1 | 1,000 | 0,00 | na |
| 6q16.1   | chr6:95460371-95613585    | 153215 | Deletion    | <i>intergenic</i>         | <i>intergenic</i>         | 0 | 1 | 1,000 | 0,00 | na |
| 6q23.3   | chr6:137943136-137992740  | 49605  | Duplication | <i>intergenic</i>         | <i>intergenic</i>         | 0 | 1 | 1,000 | 0,00 | na |
| 7p21.3   | chr7:12050906-12064226    | 13321  | Deletion    | <i>intergenic</i>         | <i>intergenic</i>         | 0 | 1 | 1,000 | 0,00 | na |
| 7q11.21  | chr7:64862630-64968436    | 105807 | Duplication | <i>CCT6P1,LOC441242</i>   | <i>CCT6P1,LOC441242</i>   | 0 | 1 | 1,000 | 0,00 | na |
| 7q21.3   | chr7:97034347-97036072    | 1726   | Duplication | <i>intergenic</i>         | <i>intergenic</i>         | 0 | 1 | 1,000 | 0,00 | na |
| 7q31.1   | chr7:110256224-110288215  | 31992  | Deletion    | <i>IMMP2L</i>             | <i>intronic</i>           | 0 | 1 | 1,000 | 0,00 | na |
| 8p23.1   | chr8:8149069-8182850      | 33782  | Duplication | <i>intergenic</i>         | <i>intergenic</i>         | 0 | 1 | 1,000 | 0,00 | na |
| 8p22     | chr8:13645043-13663608    | 18566  | Deletion    | <i>intergenic</i>         | <i>intergenic</i>         | 0 | 1 | 1,000 | 0,00 | na |
| 8q12.1   | chr8:60909551-61253195    | 343645 | Duplication | <i>intergenic</i>         | <i>intergenic</i>         | 0 | 1 | 1,000 | 0,00 | na |
| 8q24.21  | chr8:128573181-128595167  | 21987  | Deletion    | <i>intergenic</i>         | <i>intergenic</i>         | 0 | 1 | 1,000 | 0,00 | na |
| 8q24.3   | chr8:146116506-146189313  | 72808  | Deletion    | <i>ZNF16,ZNF252</i>       | <i>ZNF16,ZNF252</i>       | 0 | 1 | 1,000 | 0,00 | na |
| 10q11.21 | chr10:44538847-44641858   | 103012 | Duplication | <i>LOC220980</i>          | <i>LOC220980</i>          | 0 | 1 | 1,000 | 0,00 | na |
| 10q21.3  | chr10:67866550-68091312   | 224763 | Deletion    | <i>CTNNA3</i>             | <i>CTNNA3</i>             | 0 | 1 | 1,000 | 0,00 | na |
| 10q22.3  | chr10:81633431-81660920   | 27490  | Duplication | <i>LOC100288974</i>       | <i>LOC100288974</i>       | 0 | 1 | 1,000 | 0,00 | na |
| 10q22.3  | chr10:81702420-81757368   | 54949  | Duplication | <i>intergenic</i>         | <i>intergenic</i>         | 0 | 1 | 1,000 | 0,00 | na |
| 10q22.3  | chr10:81802016-81849467   | 47452  | Duplication | <i>C10orf57,LOC219347</i> | <i>C10orf57,LOC219347</i> | 0 | 1 | 1,000 | 0,00 | na |
| 10q22.3  | chr10:81884474-81902159   | 17686  | Duplication | <i>PLAC9</i>              | <i>PLAC9</i>              | 0 | 1 | 1,000 | 0,00 | na |
| 10q24.2  | chr10:100467375-100542446 | 75072  | Deletion    | <i>HPSE2</i>              | <i>HPSE2</i>              | 0 | 1 | 1,000 | 0,00 | na |
| 10q26.12 | chr10:122919651-122939496 | 19846  | Deletion    | <i>intergenic</i>         | <i>intergenic</i>         | 0 | 1 | 1,000 | 0,00 | na |
| 11p14.1  | chr11:30716911-30737507   | 20597  | Duplication | <i>intergenic</i>         | <i>intergenic</i>         | 0 | 1 | 1,000 | 0,00 | na |
| 11p13    | chr11:34607340-34727070   | 119731 | Duplication | <i>EHF</i>                | <i>EHF</i>                | 0 | 1 | 1,000 | 0,00 | na |
| 11p11.2  | chr11:48546574-48621207   | 74634  | Deletion    | <i>intergenic</i>         | <i>intergenic</i>         | 0 | 1 | 1,000 | 0,00 | na |

|          |                           |        |             |                                        |                                        |   |   |       |      |    |
|----------|---------------------------|--------|-------------|----------------------------------------|----------------------------------------|---|---|-------|------|----|
| 11q22.2  | chr11:102278008-102326614 | 48607  | Deletion    | <i>MMP13</i>                           | <i>MMP13</i>                           | 0 | 1 | 1,000 | 0,00 | na |
| 13q32.1  | chr13:94740493-94764852   | 24360  | Duplication | <i>ABCC4</i>                           | <i>ABCC4</i>                           | 0 | 1 | 1,000 | 0,00 | na |
| 14q23.1  | chr14:59651616-59703483   | 51868  | Duplication | <i>C14orf135,DHRS7</i>                 | <i>C14orf135,DHRS7</i>                 | 0 | 1 | 1,000 | 0,00 | na |
| 14q32.33 | chr14:105714823-105780975 | 66153  | Deletion    | <i>intergenic</i>                      | <i>intergenic</i>                      | 0 | 1 | 1,000 | 0,00 | na |
| 15q13.3  | chr15:30297184-30302973   | 5790   | Duplication | <i>intergenic</i>                      | <i>intergenic</i>                      | 0 | 1 | 1,000 | 0,00 | na |
| 15q23    | chr15:66422629-66472024   | 49396  | Duplication | <i>ITGAI1</i>                          | <i>ITGAI1</i>                          | 0 | 1 | 1,000 | 0,00 | na |
| 15q25.3  | chr15:85634145-85671028   | 36884  | Deletion    | <i>intergenic</i>                      | <i>intergenic</i>                      | 0 | 1 | 1,000 | 0,00 | na |
| 16p13.11 | chr16:15631614-15790710   | 159097 | Duplication | <i>KIAA0430,MIR484,<br/>MYH11,NDE1</i> | <i>KIAA0430,MIR484,<br/>MYH11,NDE1</i> | 0 | 1 | 1,000 | 0,00 | na |
| 16p13.11 | chr16:15900900-15944762   | 43863  | Duplication | <i>intergenic</i>                      | <i>intergenic</i>                      | 0 | 1 | 1,000 | 0,00 | na |
| 16p13.11 | chr16:16031509-16065535   | 34027  | Duplication | <i>ABCC1</i>                           | <i>ABCC1</i>                           | 0 | 1 | 1,000 | 0,00 | na |
| 16p13.11 | chr16:16088643-16094970   | 6328   | Duplication | <i>ABCC1</i>                           | <i>ABCC1</i>                           | 0 | 1 | 1,000 | 0,00 | na |
| 16p13.11 | chr16:16178405-16197033   | 18629  | Duplication | <i>ABCC6</i>                           | <i>ABCC6</i>                           | 0 | 1 | 1,000 | 0,00 | na |
| 16p12.3  | chr16:16817634-16958375   | 140742 | Duplication | <i>intergenic</i>                      | <i>intergenic</i>                      | 0 | 1 | 1,000 | 0,00 | na |
| 16p12.3  | chr16:17075737-17176986   | 101250 | Duplication | <i>XYLT1</i>                           | <i>XYLT1</i>                           | 0 | 1 | 1,000 | 0,00 | na |
| 16p12.3  | chr16:17541215-17773612   | 232398 | Duplication | <i>intergenic</i>                      | <i>intergenic</i>                      | 0 | 1 | 1,000 | 0,00 | na |
| 16p12.3  | chr16:17942205-18063852   | 121648 | Duplication | <i>intergenic</i>                      | <i>intergenic</i>                      | 0 | 1 | 1,000 | 0,00 | na |
| 16p11.2  | chr16:34332760-34393084   | 60325  | Duplication | <i>intergenic</i>                      | <i>intergenic</i>                      | 0 | 1 | 1,000 | 0,00 | na |
| 18q22.1  | chr18:62256840-62485883   | 229044 | Deletion    | <i>CDH19</i>                           | <i>CDH19</i>                           | 0 | 1 | 1,000 | 0,00 | na |
| 19p13.3  | chr19:3755701-3779433     | 23733  | Duplication | <i>ZFR2</i>                            | <i>ZFR2</i>                            | 0 | 1 | 1,000 | 0,00 | na |
| 19q12    | chr19:33063516-33142870   | 79355  | Deletion    | <i>intergenic</i>                      | <i>intergenic</i>                      | 0 | 1 | 1,000 | 0,00 | na |
| 22q11.1  | chr22:15599625-15826991   | 227367 | Duplication | <i>GAB4,HSFY1P1,XKR3</i>               | <i>GAB4,HSFY1P1,XKR3</i>               | 0 | 1 | 1,000 | 0,00 | na |

Abbreviations: CI = confidence interval; HBOC = hereditary breast and/or ovarian cancer; ind = individual; na = not available; no = number; OR = odds ratio.

<sup>a</sup>According to the NCBI Genome Build 36 (hg 18).
