# Supplementary material for: Copy Number Variation Analysis in Familial BRCA1/2-Negative Finnish Breast and Ovarian Cancer
Source: PubMed Central journal article supplement (PMC3742470; doi:10.1371/journal.pone.0071802), 2013-08-13
Supplement: pone.0071802.s003.pdf [file pone.0071802.s003.pdf]

**Table S2. Enriched GO term categories and pathways (*P*-value less than 0.05) involving *EPHA3*, *ERBB4* and *BRCA1*.**

| <b><u>EPHA3-and ERBB4-related molecular functions by GO analysis</u></b>        | <b><u>GO term/pathway id</u></b> |
|---------------------------------------------------------------------------------|----------------------------------|
| Receptor activity                                                               | GO:0004872                       |
| Transmembrane receptor activity                                                 | GO:0004888                       |
| Molecular transducer activity                                                   | GO:0060089                       |
| Signal transducer activity                                                      | GO:0004871                       |
| <br>                                                                            |                                  |
| <b><u>EPHA3-related biological processes by GO analysis</u></b>                 |                                  |
| multi-organism process                                                          | GO:0051704                       |
| <br>                                                                            |                                  |
| <b><u>EPHA3-related pathways by KEGG pathway analysis</u></b>                   |                                  |
| Axon guidance                                                                   | KEGG ID:4360                     |
| <br>                                                                            |                                  |
| <b><u>ERBB4-related pathways by KEGG pathway analysis</u></b>                   |                                  |
| Calcium signaling pathway                                                       | KEGG ID:4020                     |
| <br>                                                                            |                                  |
| <b><u>BRCA1-related pathways by pathway commons analysis</u></b>                |                                  |
| Homologous recombination repair of replication-independent double-strand breaks | DB_ID:433                        |
| ATM mediated response to DNA double-strand break                                | DB_ID:435                        |
| Homologous Recombination Repair                                                 | DB_ID:432                        |
| Double-Strand Break Repair                                                      | DB_ID:767                        |

Enrichment analysis was performed using the Web-based Gene Set Analysis Toolkit V2 (WebGestalt2) [1].

## References

1. Zhang B, Kirov S, Snoddy J. (2005) WebGestalt: An integrated system for exploring gene sets in various biological contexts. *Nucleic Acids Res* 33: W741-8.
