# Supplementary material for: Copy Number Variation Analysis in Familial BRCA1/2-Negative Finnish Breast and Ovarian Cancer
Source: PubMed Central journal article supplement (PMC3742470; doi:10.1371/journal.pone.0071802), 2013-08-13
Supplement: pone.0071802.s005.pdf [file pone.0071802.s005.pdf]

**File S2. Clinical characteristics of 20 additional HBOC individuals utilised for CNV validation analysis.**

| Family                    | Cancer (age at diagnosis)               | Breast / Ovarian cancer       |                 |                                                                                                      |
|---------------------------|-----------------------------------------|-------------------------------|-----------------|------------------------------------------------------------------------------------------------------|
|                           |                                         | histology/grade               | Receptor status | Breast / Ovarian cancer cases in the family (age at diagnosis if known)                              |
| TuFamBC1                  | Breast (38)                             | ductal, gr 3                  | ER+, PR+, HER2+ | Maternal side of the family: Bilateral Breast (61), 2 x Breast (36 and 59)                           |
| TuFamBC2                  | Breast (41)                             | ductal, gr 2                  | ER+, PR+, HER2+ | Maternal side of the family: 3x Breast (60, 60, 66)                                                  |
| TuFamBC3                  | Breast (28)                             | ductal, gr 3                  | ER-, PR-, HER2- | Maternal side of the family: Breast (45)                                                             |
| TuFamBC4                  | Breast (32)                             | ductal, gr 3                  | ER-, PR+, HER2- | Maternal side of the family: 2 x Breast (early onset, 60)                                            |
| TuFamBC5                  | Breast (32)                             | ductal, gr 1                  | ER+, PR+, HER2- | Maternal side of the family: Breast (70); Sister: Breast (44 and 49)                                 |
| TuFamBC6                  | Bilateral Breast (40)                   | ductal, gr 1 and ductal, gr 3 | ER+, PR+, HER2- | -                                                                                                    |
| TuFamBC7 <sup>a</sup>     | Breast (36)                             | ductal, na                    | ER+, PR+, HER2- | Maternal side of the family: Breast (55)                                                             |
| TuFamBC8 <sup>a</sup>     | Breast (28)                             | ductal, gr 3                  | ER+, PR+, HER2+ | Maternal side of the family: 2 x Breast; Paternal side of the family: Breast (78)                    |
| TuFamBC9                  | Bilateral Breast (44)                   | ductal, na                    | ER+, PR+, HER2- | Sister: Breast (58)                                                                                  |
| TuFamBC10                 | Breast (49)                             | ductal, gr 3                  | ER+, PR+, HER2+ | Sister: Bilateral Breast (43)                                                                        |
| TuFamBC11                 | Breast (53)                             | ductal, gr 1                  | ER+, PR+, HER2- | Maternal side of the family: Breast (53); Sister: Breast (42)                                        |
| TuFamBC12 <sup>a, c</sup> | Breast (66)                             | ductal, gr 2                  | ER+, PR+, HER2- | Sisters: Breast (61), 2x Ovarian (67, 78); Paternal side of the family: Breast                       |
| TuFamBC13 <sup>c</sup>    | Ovarian (61)                            | serous papillary, gr 3        | -               | Sister: Breast (50)                                                                                  |
| TuFamBC14                 | Breast (50)                             | ductal, gr 2                  | ER+, PR+, na    | Maternal side of the family: Breast (35)                                                             |
| TuFamBC15 <sup>b</sup>    | Breast (46)                             | ductal, gr 3                  | ER+, PR+, HER2- | Sister: Breast (36)                                                                                  |
| TuFamBC16                 | Breast (74)                             | ductal, gr 2                  | ER+, PR+, HER2- | Maternal side of the family: Breast (80), Ovarian (75); Sisters: Bilateral Breast (57), Ovarian (78) |
| TuFamBC17                 | Bilateral Breast (35)                   | ductal, gr 1                  | ER+, PR+, na    | Maternal side of the family: Breast, Paternal side of the family: Breast                             |
| TuFamBC18 <sup>c</sup>    | Bilateral Breast (50, 70), Ovarian (60) | ductal, gr 1                  | ER+, PR+, HER2- | Maternal side of the family: Breast                                                                  |
| TuFamBC19                 | Breast (48)                             | lobular, gr 1                 | ER+, PR+, HER2- | Maternal side of the family: Breast (57)                                                             |
| TuFamBC20 <sup>c</sup>    | Breast (52)                             | ductal, gr 1                  | ER+, PR+, HER2- | Maternal side of the family: 2 x Breast (45, 50), Ovarian (45); Sisters: 2 x Breast (52 and 58),     |

Abbreviations: ER = estrogen receptor; gr = grade; HER2 = human epidermal growth factor receptor 2; na = not available; PR = progesterone receptor.

<sup>a</sup> Heterozygous duplication in the 19q13.41 region (copy number 3). <sup>b</sup> Homozygous duplication in the 19q13.41 region (copy number 4). <sup>c</sup> Heterozygous deletion in the 3p11.1 region (copy number 1).
