# Supplementary material for: Copy Number Variation Analysis in Familial BRCA1/2-Negative Finnish Breast and Ovarian Cancer
Source: PubMed Central journal article supplement (PMC3742470; doi:10.1371/journal.pone.0071802), 2013-08-13
Supplement: pone.0071802.s006.pdf [file pone.0071802.s006.pdf]

**File S3. Copy number variation validation protocol by quantitative RT-PCR.**

Amplification reactions (10  $\mu$ l) were performed in quadruplicate with 10 ng of template DNA, 2X TaqMan® Genotyping Master Mix (Applied Biosystems, Foster City, CA, USA), 900 nM of each primer and 250 nM of each fluorogenic probe. Thermal cycling conditions were: 2 mins at 50° C, 10 mins at 95° C, followed by 40 cycles of 15 secs at 95° C and 60 secs at 60° C. Real-time data was collected by SDS 2.2.2 software (Applied Biosystems) and analyzed by the Copy Caller v.1.0 software (Applied Biosystems). Comparative  $C_T$  method (Applied Biosystems user bulletin Part number 4400042) was used to calculate copy numbers. Each replicate was normalized to RNaseP to get  $\Delta C_T$  (FAM dye  $C_T$  – VIC dye  $C_T$ ). Average  $\Delta C_T$  for each sample was calculated from the four replicates. All of the samples were normalized to a calibrator sample to determine  $\Delta\Delta C_T$ . Copy number was obtained from the formula  $2^{x2^{-\Delta\Delta C_T}}$ . Each experiment was repeated three times.
